# Supplementary material
Source: PubMed Central journal article supplement (PMC10007911)
Supplement: NIHMS1864239-supplement-Supplementary_Figure_1.pdf [file NIHMS1864239-supplement-Supplementary_Figure_1.pdf]

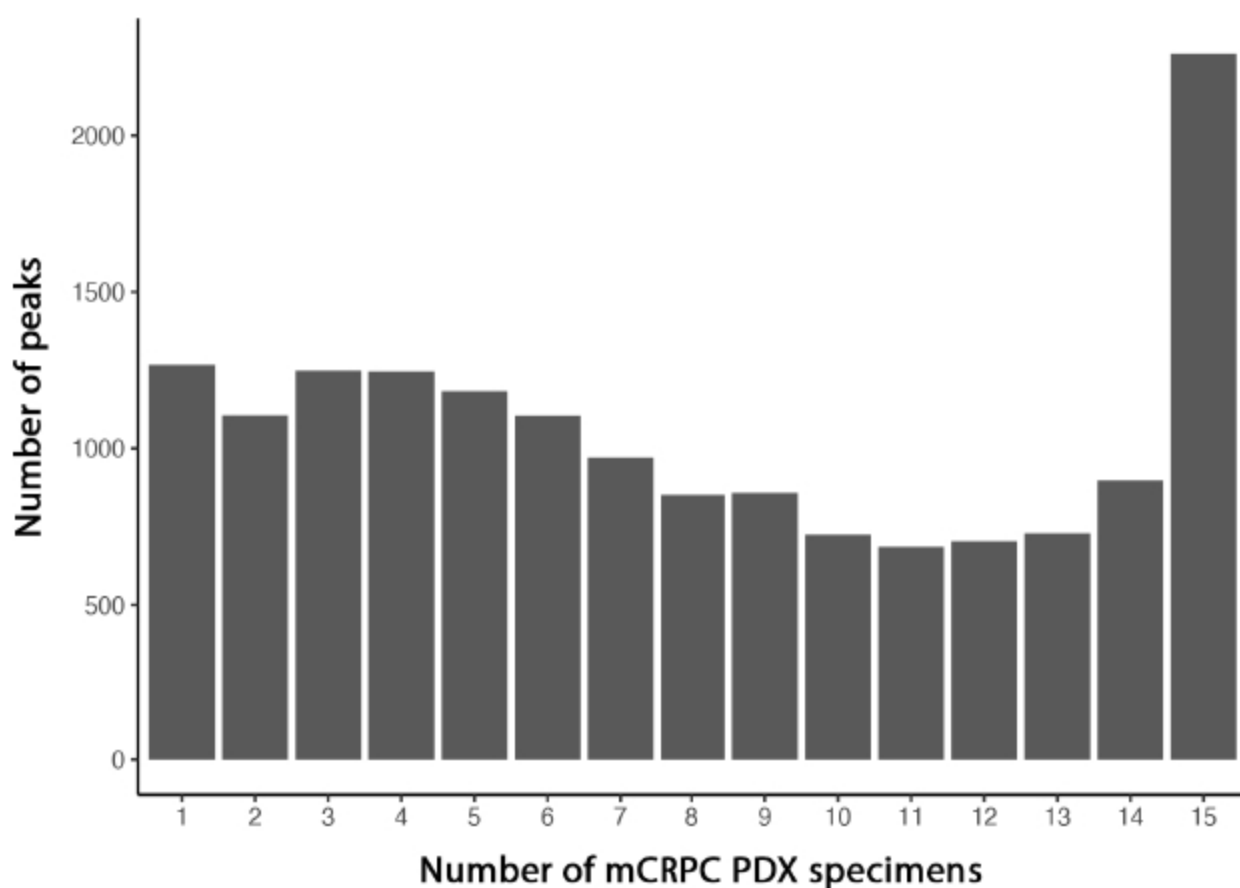

**Supplementary Figure 1: Number of the 16,047 mCRPC-specific H3K27Ac sites shared among fifteen mCRPC tumors.** A majority of met-K27ac sites are shared by a majority of specimens in the cohort . The Y-axis depicts the number of met-K27ac sites. The X-axis shows the number of individuals sharing peaks out of the total 15 specimens.
