# Supplementary material
Source: PubMed Central journal article supplement (PMC10007911)
Supplement: NIHMS1864239-supplement-Supplementary_Figure_2.pdf [file NIHMS1864239-supplement-Supplementary_Figure_2.pdf]

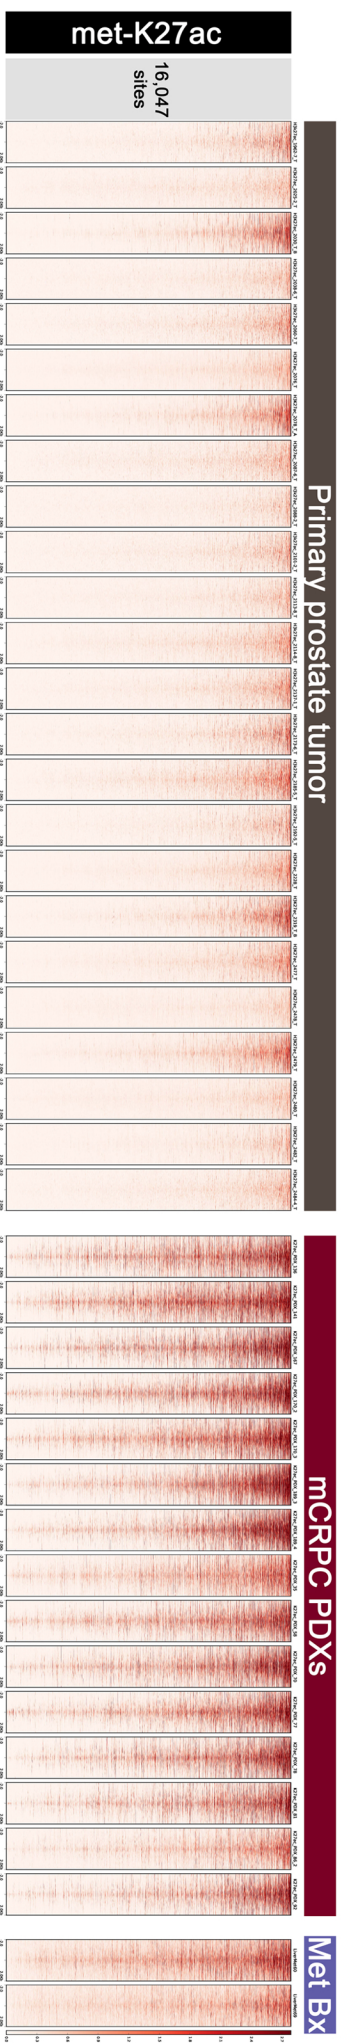

**Supplementary Figure 2: Heat map of H3K27Ac ChIP-seq at the 16,047 met-K27ac sites for each of the localized tumor, mCRPC PDX, and direct patient mCRPC liver biopsy specimens. Each column is an individual subject. Each horizontal line represents a four kilobase (kb) locus. Shade of red reflects binding intensity. The met-K27ac sites are highly recurrent and enriched throughout the PDXs as well as direct mCRPC liver biopsy specimens.**
