# Supplementary material
Source: PubMed Central journal article supplement (PMC10007911)
Supplement: NIHMS1864239-supplement-Supplementary_Figure_3.pdf [file NIHMS1864239-supplement-Supplementary_Figure_3.pdf]

### FOXA1 cistromes

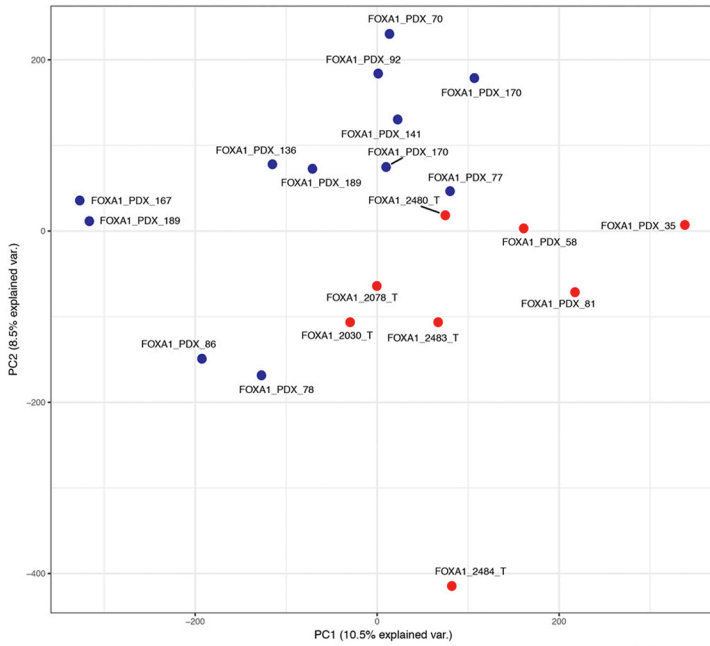

### HOXB13 cistromes

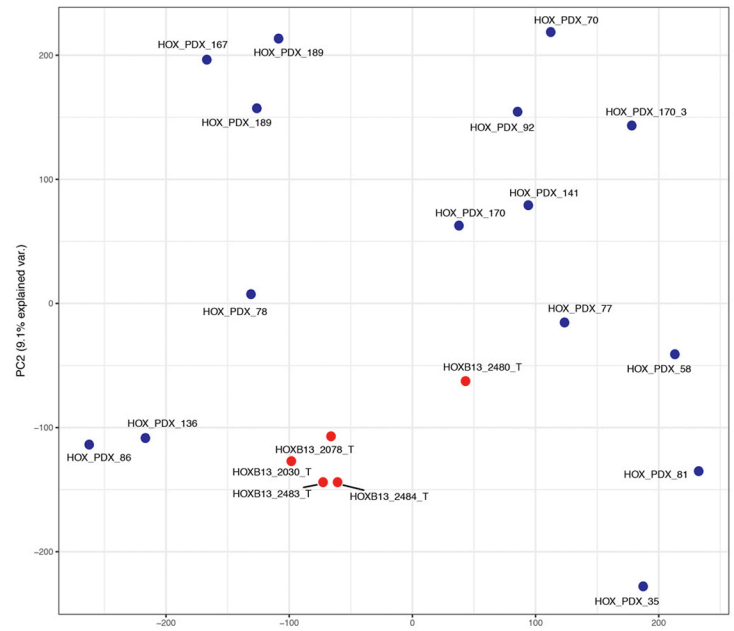

● mCRPC PDX  
● localized tumor

**Supplementary Figure 3: Principal component analysis of the FOXA1 and HOXB13 cistromes across FOXA1 and HOXB13 cistromes across localized prostate tumor and mCRPC states.** Each dot represents the genome-wide FOXA1 (left panel) or HOXB13 (right panel) cistrome in an individual specimen, in localized prostate tumor (red) and in mCRPC (blue).
