# Supplementary material
Source: PubMed Central journal article supplement (PMC10007911)
Supplement: NIHMS1864239-supplement-Supplementary_Figure_4.pdf [file NIHMS1864239-supplement-Supplementary_Figure_4.pdf]

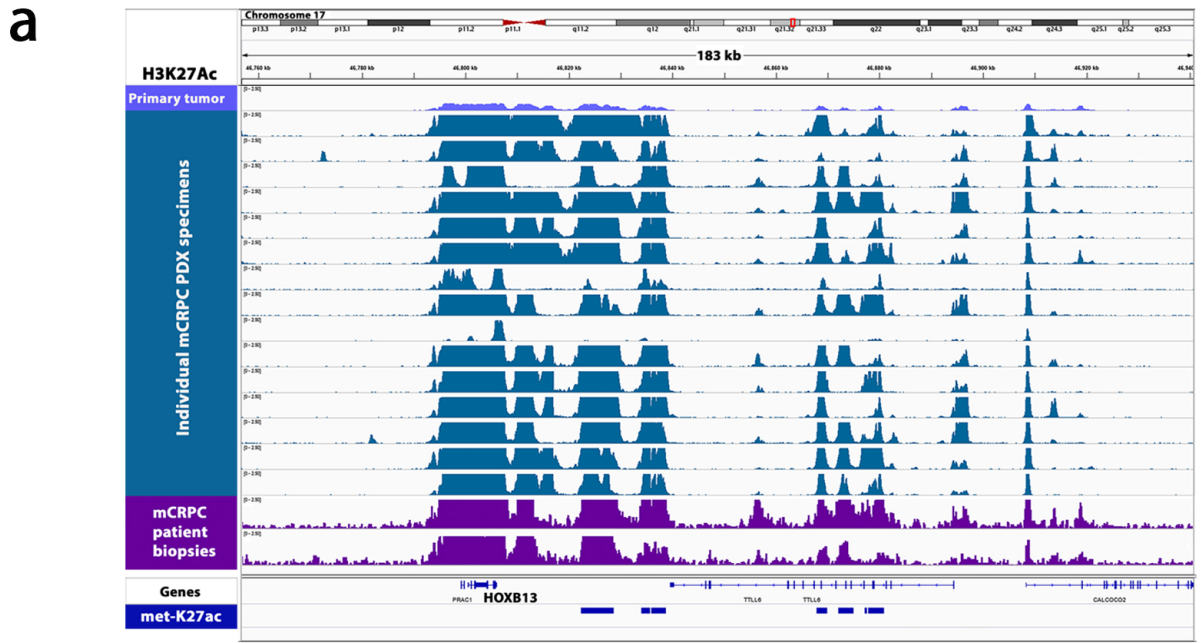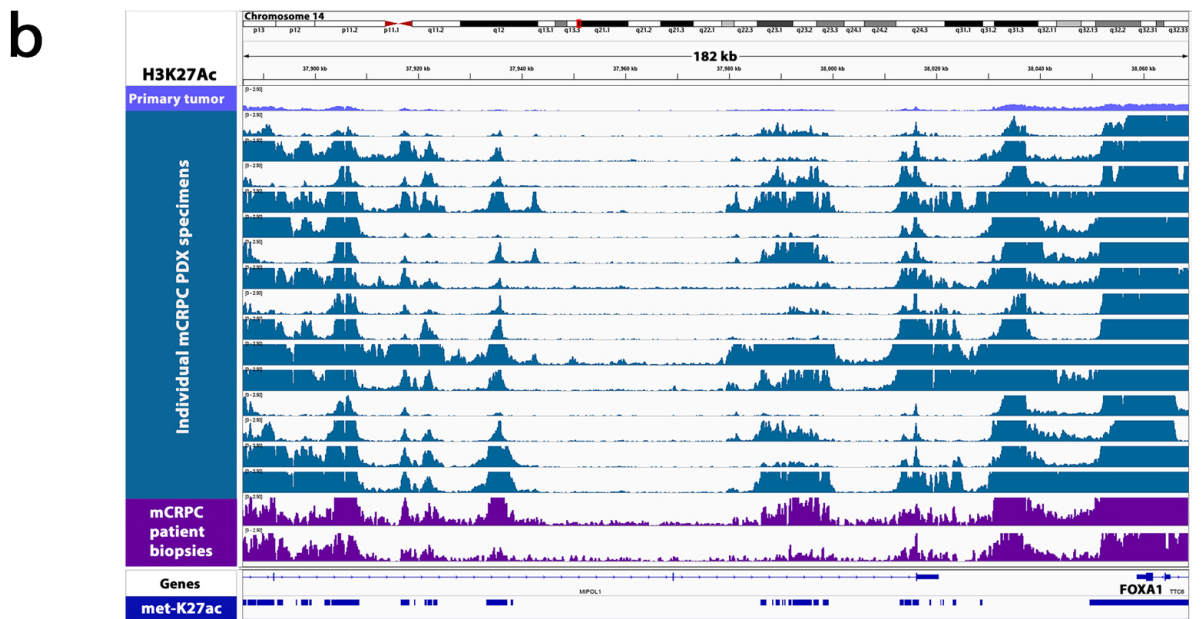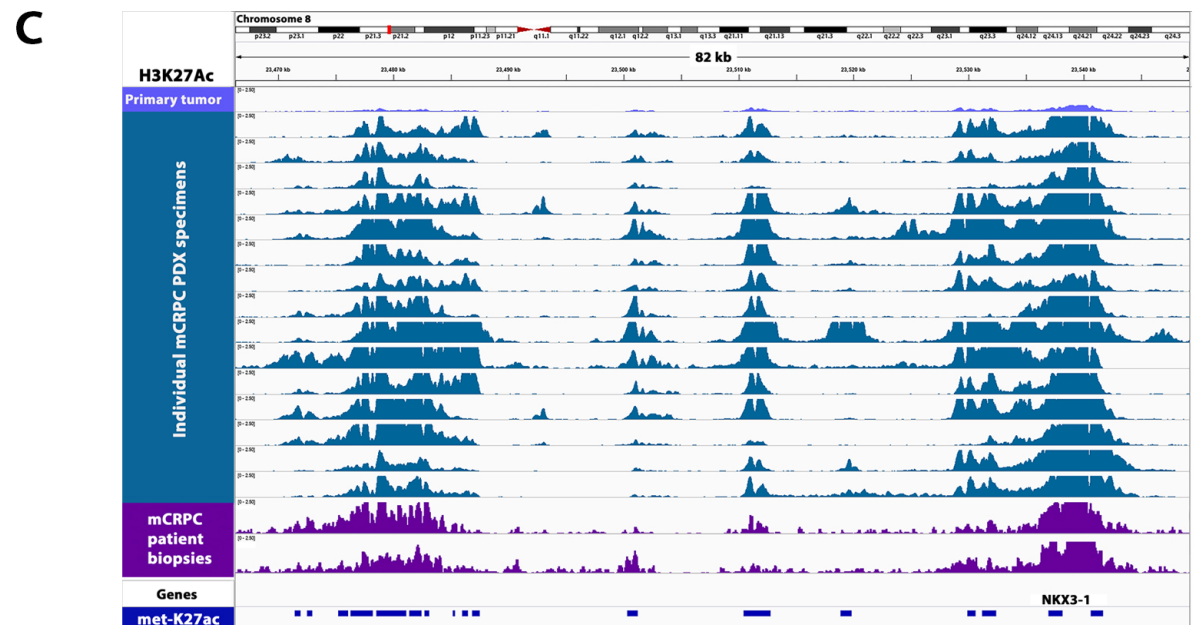

**Supplementary Figure 4: met-K27ac sites at candidate enhancers are recurrent across multiple subjects in the cohort.** H3K27Ac signal is depicted for each of the 15 human derived mCRPC PDXs, two direct patient mCRPC biopsies, and the averaged signal of all DFCI primary tumors. Met-K27ac sites are depicted by blue bars in the bottom track. (a) locus containing HOXB13; (b) locus containing FOXA1; locus containing NKX3-1.
