# Supplementary material
Source: PubMed Central journal article supplement (PMC10007911)
Supplement: NIHMS1864239-supplement-Supplementary_Figure_5.pdf [file NIHMS1864239-supplement-Supplementary_Figure_5.pdf]

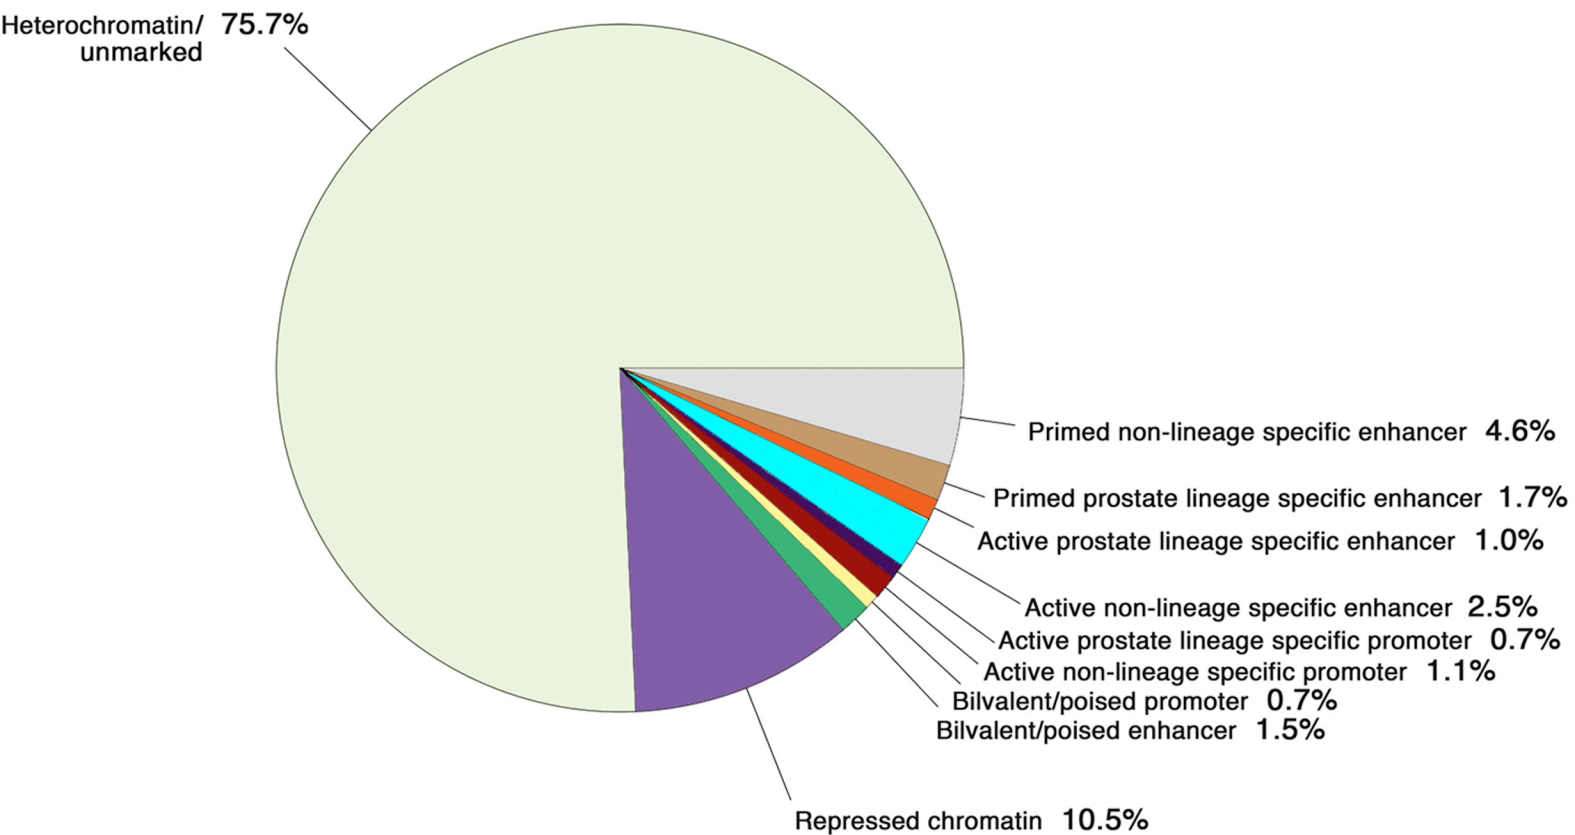

**Supplementary Figure 5. Proportion of the primary prostate tumor genome comprised of each chromHMM chromatin state**
