# Supplementary material
Source: PubMed Central journal article supplement (PMC10007911)
Supplement: NIHMS1864239-supplement-Supplementary_Figure_6.pdf [file NIHMS1864239-supplement-Supplementary_Figure_6.pdf]

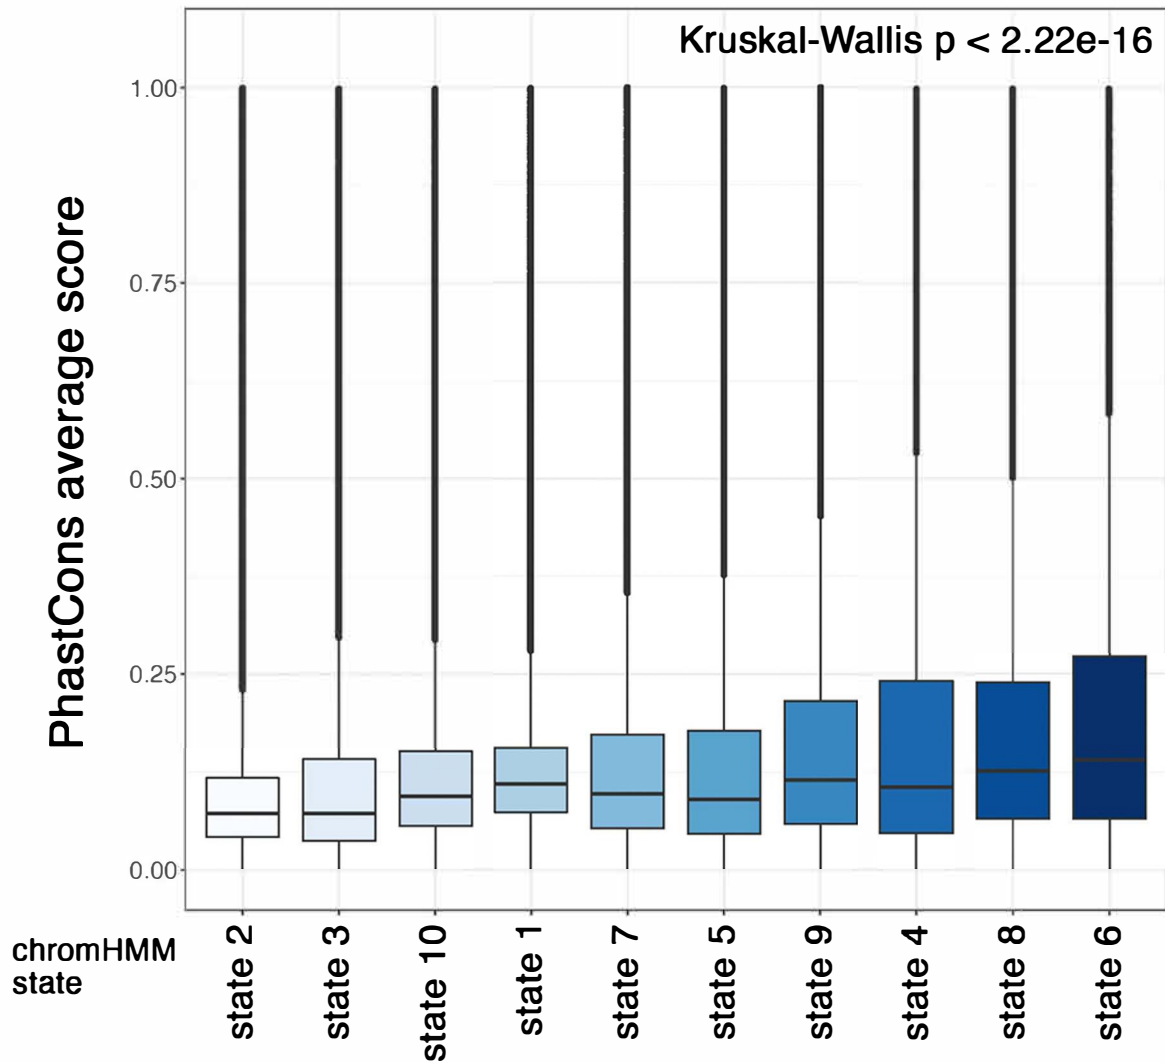

**Supplementary Figure 6. Genetic conservation at primary prostate tumor chromHMM states.** Boxplots showing the average phastCons conservation scores for regions defining chromHMM state in primary human tumors. Higher scores and shading indicate higher conservation scores. Kruskal-Wallis test is shown for trend across the entire dataset. Box plots indicate the median and range of scores for each state. The two most highly conserved states are prostate- lineage specific enhancers and promoters.
